# Supplementary material for: Disruption of 24-Hour Rhythm in Intraocular Pressure Correlates with Retinal Ganglion Cell Loss in Glaucoma
Source: MDPI journal article supplement (doi:10.3390/ijms22010359), 2020-12-31
Supplement: s1 [file s1]

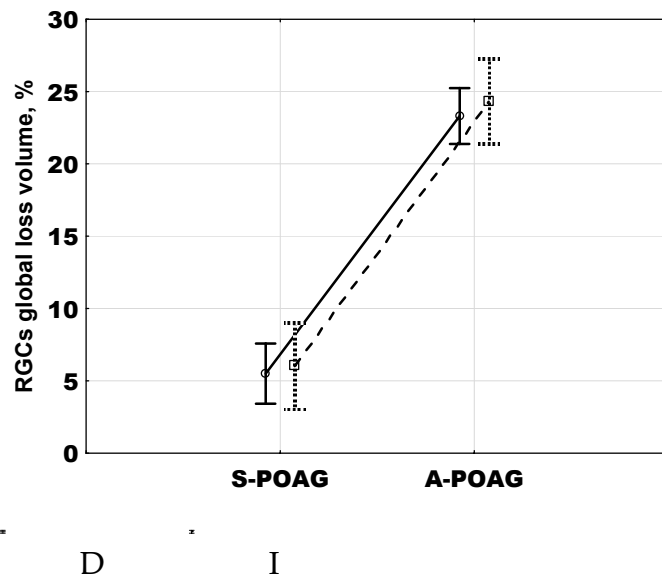

Figure S1. Similar retinal ganglion cells (RGCs, 2-eye mean) global loss volume between *Alu*-repeat deletion carriers, D-carriers (D) and non-carriers (I) of stable or advanced primary open-angle glaucoma (S-POAG and A-POAG) groups; two-eyes mean values are depicted, allele\*group interaction ( $F_{(1, 15)} = 0.041$ ,  $p = 0.843$ ). D – *Alu*-repeat deletion carriers (DD and ID genotypes combined); I - non-carriers of *Alu*-repeat deletion.

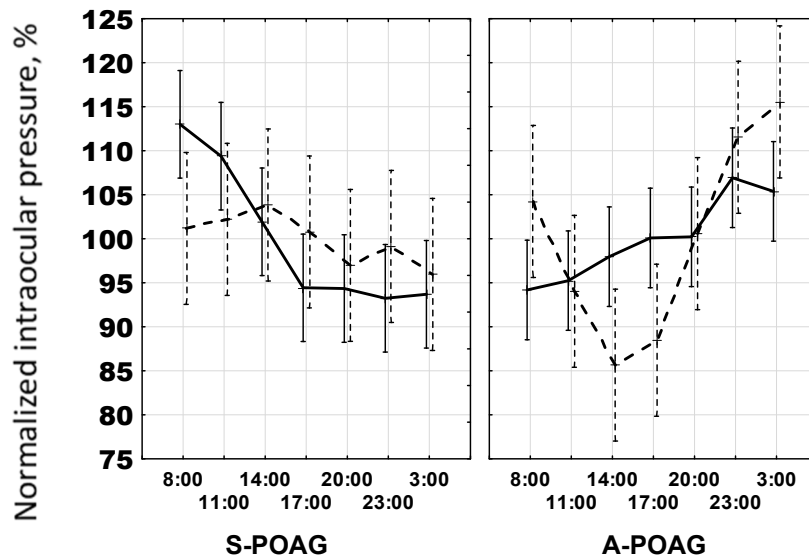

D I

Figure S2. ACE *Alu*-repeat insertion-deletion (I/D) polymorphism defines specific left-eye IOP 24-hour pattern. MANOVA for time\*group\*allele interaction:  $F_{(6, 371)} = 3.27$ ,  $p=0.004$ . Normalized data (percentages of the individual IOP averages, IOP%) were used to avoid bias, stemming from different inter-individual / inter-group IOP mean values. D – *Alu*-repeat deletion carriers (DD and ID genotypes combined); I - non-carriers of *Alu*-repeat deletion.

Figure S3. Examples of Optical Coherence Tomography protocols representing patients with stable primary open-angle glaucoma (left) and advanced primary open-angle glaucoma (right).

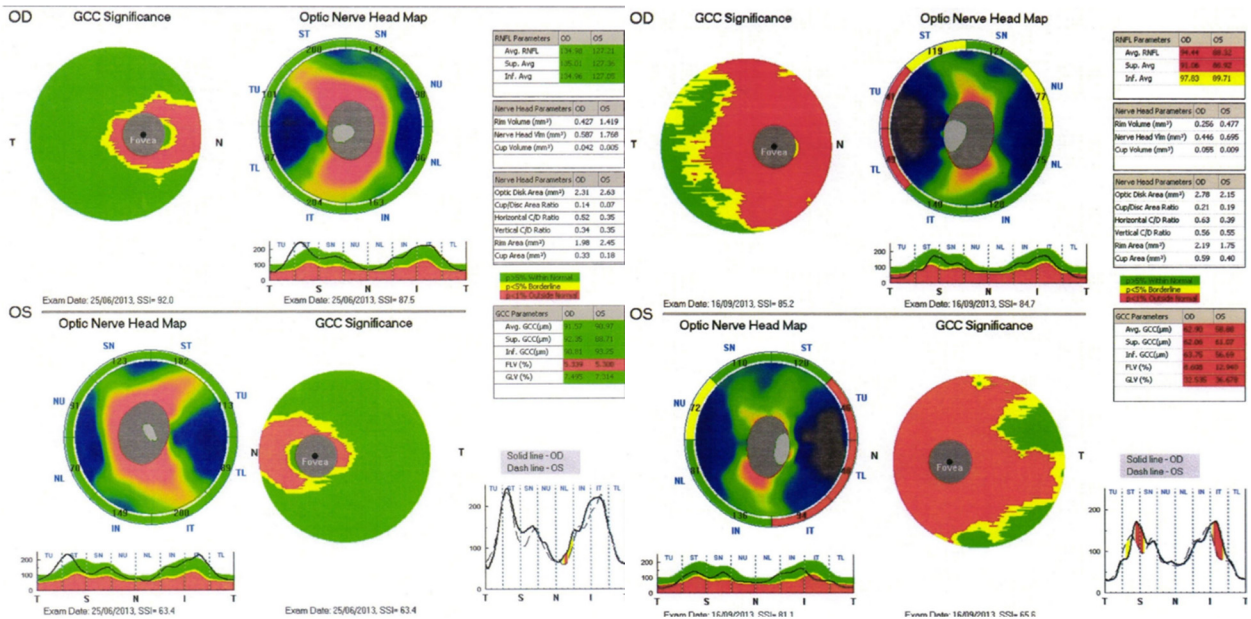

Table S1. Comparative analysis of IOP 24-hour patterns in two groups of POAG patients with different drug treatment or surgery.

|        | Drug treatment    |                   |                   | Surgery           |
|--------|-------------------|-------------------|-------------------|-------------------|
|        | BB                | PGA               | CAI               | NPDS              |
| IOP OD | F=0.18<br>p=0.981 | F=0.19<br>p=0.979 | F=0.96<br>p=0.452 | F=0.11<br>p=0.996 |
| IOP OS | F=0.58<br>p=0.749 | F=0.45<br>p=0.846 | F=0.09<br>p=0.997 | F=0.47<br>p=0.828 |

Notes: Treatment consisted of daily drug administration or surgery. Results from MANOVA testing for TIME\*GROUP (S-POAG/A-POAG)\*TREATMENT (yes/no) interaction; IOP – intraocular pressure; POAG – primary open-angle glaucoma: S – stable; A – advanced; BB – beta blockers; PGA – prostaglandin F2 $\alpha$  analogues; CAI – carbonic anhydrase inhibitors; NPDS – non-penetrating deep sclerectomy.

Table S2. Clinical and Sleep Characteristics of Patients with Stable and Advanced Primary Open-Angle Glaucoma, engaged in gene polymorphisms study

|                                | <b>Stable POAG</b>   | <b>Advanced POAG</b>  | <b>P value</b> |
|--------------------------------|----------------------|-----------------------|----------------|
| Age, yrs.                      | 65.56 (58.29; 72.82) | 67.10 (61.21; 72.99)  | 0.806§         |
| Sex                            | n=9, 4 women         | n=10, 5 women         | 0.809#         |
| BMI                            | 27.62 (25.62; 29.62) | 26.65 (24.40; 28.90)  | 0.683§         |
| Mean IOP OD, mmHg              | 14.51 (12.28; 16.74) | 21.14 (18.13; 24.15)  | 0.004§         |
| Mean IOP OS, mmHg              | 14.87 (12.42; 17.31) | 22.70 (19.87; 25.52)  | 0.001§         |
| Global Loss Volume mean, %     | 5.67 (4.30; 7.04)    | 23.61 (21.71; 25.50)  | <0.001§        |
| Focal Loss Volume mean, %      | 2.79 (0.99; 4.58)    | 10.88 (9.19; 12.56)   | <0.001§        |
| SAP mD mean, dB                | -1.93 (-2.28; -1.58) | -9.41 (-14.58; -5.23) | 0.012§         |
| PERG P50 A mean, µV            | 2.04 (1.69; 2.39)    | 1.11 (0.68; 1.53)     | 0.005§         |
| Bedtime mean, hour: min        | 22:28 (22:07; 22:50) | 22:48 (22:08; 23:39)  | 0.369§         |
| Waketime mean, hour: min       | 6:00 (5:36; 6:24)    | 5:40 (4:58; 6:22)     | 0.462§         |
| Mean Sleep Duration, hour: min | 7:32 (6:57; 8:07)    | 6:51 (6:24; 7:19)     | 0.037§         |
| Mean Sleep Phase, hour: min    | 2:14 (2:00; 2:29)    | 2:14 (1:35; 2:53)     | 0.775§         |
| MEQ, Score                     | 59.22 (45.18; 73.26) | 61.00 (51.63; 70.37)  | 0.934§         |
| Tb phi, hour: min              | 15:41 (14:06; 17:17) | 20:03 (17:39; 22:26)  | 0.010§         |

BMI – body mass index; IOP OD –24-hour mean intraocular pressure, right eye; IOP OS –24-hour mean intraocular pressure, left eye; SAP mD - Standard Automated Perimetry Mean Deviation; PERG P50 A – Pattern Electroretinogram main positive peak (P50) Amplitude; MEQ Score – Horne-Ostberg's Morningness-Eveningness Questionnaire score; Tb phi –circadian mean phase of body temperature; Mean (95% confidence range).

§ Mann-Whitney U test; # Pearson's chi-square test
